# Supplementary material
Source: PubMed Central journal article supplement (PMC4318721)
Supplement: NIHMS641564-supplement-Supp_FigureS1.pdf [file NIHMS641564-supplement-Supp_FigureS1.pdf]

Tissue expression pattern for human *TRPC3* is shown graphically (A). Values (log<sub>2</sub>) are indicated for one probe set (B). Expression in the cerebellum is highlighted. Known transcript isoforms of human *TRPC3* are shown (C). The canonical transcript is indicated. Transcripts targeted by individual probe sets in A & B are shown (D).

Data in A and B were obtained from COXPRESdb (<http://coxpresdb.jp/>).

Reference: Obayashi T, Okamura Y, Ito S, Tadaka S, Motoike IN, Kinoshita K. (2013) COXPRESdb: a database of comparative gene coexpression networks of eleven species for mammals. *Nucleic Acids Res.* 41, D1014-20.

Data in C and D were obtained from Ensembl (<http://www.ensembl.org/>).

Reference: Flicek P, Amodè MR, Barrell D, Beal K, Billis K, et al. Ensembl 2014 *Nucleic Acids Research* 2014 42 Database issue:D749-D755

A.

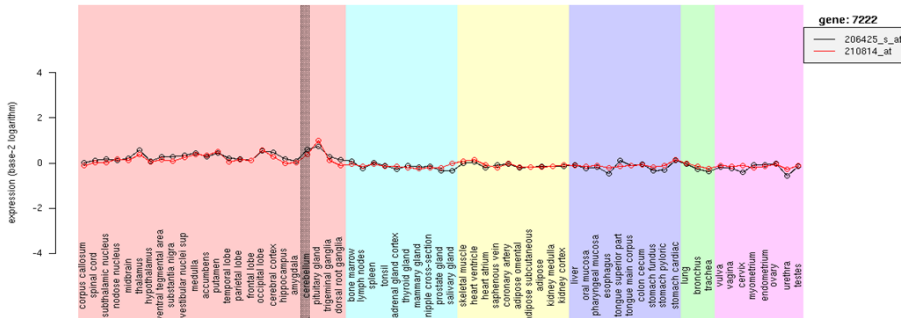

B.

| Species                | Hsa           |
|------------------------|---------------|
| Symbol*                | TRPC3         |
| Entrez Gene ID         | 7222          |
| Affy probe ID          | 210814_at     |
| pituitary gland        | 0.9843        |
| occipital lobe         | 0.5648        |
| putamen                | 0.5044        |
| <b>cerebellum</b>      | <b>0.3858</b> |
| thalamus               | 0.3787        |
| medulla                | 0.3715        |
| accumbens              | 0.34          |
| cerebral cortex        | 0.2842        |
| vestibular nuclei sup  | 0.252         |
| nodose nucleus         | 0.1737        |
| ventral tegmental area | 0.1614        |
| parietal lobe          | 0.1608        |
| stomach cardiac        | 0.1534        |
| heart ventricle        | 0.1501        |
| trigeminal ganglia     | 0.1308        |
| frontal lobe           | 0.1279        |
| midbrain               | 0.1241        |
| substantia nigra       | 0.0867        |
| skeletal muscle        | 0.0864        |
| temporal lobe          | 0.0585        |
| hypothalamus           | 0.0554        |
| amygdala               | 0.0213        |
| subthalamic nucleus    | 0.0168        |
| spinal cord            | 0.0117        |
| hippocampus            | -0.005        |
| lung                   | -0.0145       |
| salivary gland         | -0.0247       |
| coronary artery        | -0.0312       |
| spleen                 | -0.037        |
| bone marrow            | -0.0515       |
| ovary                  | -0.0654       |
| colon cecum            | -0.0923       |
| heart atrium           | -0.0942       |
| kidney cortex          | -0.095        |
| vulva                  | -0.0996       |
| tongue main corpus     | -0.1036       |
| dorsal root ganglia    | -0.104        |
| corpus callosum        | -0.1084       |
| pharyngeal mucosa      | -0.1113       |
| cervix                 | -0.1157       |
| liver                  | -0.1168       |
| testes                 | -0.1267       |
| stomach pyloric        | -0.1271       |
| lymph nodes            | -0.1353       |
| bronchus               | -0.1355       |
| tongue superior part   | -0.1359       |
| adrenal gland cortex   | -0.1413       |
| kidney medulla         | -0.1415       |
| tonsil                 | -0.1433       |
| oral mucosa            | -0.1515       |
| vagina                 | -0.1586       |
| endometrium            | -0.1605       |
| stomach fundus         | -0.1638       |
| adipose subcutaneous   | -0.1712       |
| adipose omental        | -0.1725       |
| adipose                | -0.1944       |
| thyroid gland          | -0.2047       |
| nipple cross-section   | -0.2068       |
| prostate gland         | -0.2102       |
| myometrium             | -0.2184       |
| saphenous vein         | -0.2203       |
| esophagus              | -0.2283       |
| trachea                | -0.2413       |
| mammary gland          | -0.2418       |
| urethra                | -0.2826       |

C.

| Transcript            | TRPC3-001       | TRPC3-002       | TRPC3-003       | TRPC3-004         | TRPC3-005       |
|-----------------------|-----------------|-----------------|-----------------|-------------------|-----------------|
| Ensembl Gene ID       | ENSG00000138741 | ENSG00000138741 | ENSG00000138741 | ENSG00000138741   | ENSG00000138741 |
| Ensembl Transcript ID | ENST00000264811 | ENST00000379645 | ENST00000502968 | ENST00000506449   | ENST00000513531 |
| Length (bp)           | 3675            | 3548            | 619             | 2700              | 2382            |
| Protein ID            | ENSP00000264811 | ENSP00000368966 | ENSP00000422214 | ENSP00000423866   | ENSP00000426899 |
| Length (aa)           | 848             | 921             | 93              | 276               | 793             |
| Biotype               | Protein coding  | Protein coding  | Protein coding  | Nonsense mediated | Protein coding  |
| Exon Chr Start (bp)   |                 | 122872621       | 122871694       |                   |                 |
| Exon Chr End (bp)     |                 | 122872909       | 122872029       |                   |                 |
| Exon Chr Start (bp)   | 122853426       | 122853426       | 122853915       | 122853426         | 122853426       |
| Exon Chr End (bp)     | 122854612       | 122854197       | 122854197       | 122854268         | 122854193       |
| Exon Chr Start (bp)   |                 |                 |                 | 122851926         |                 |
| Exon Chr End (bp)     |                 |                 |                 | 122851983         |                 |
| Exon Chr Start (bp)   | 122846173       | 122846173       |                 | 122846173         | 122846173       |
| Exon Chr End (bp)     | 122846361       | 122846361       |                 | 122846361         | 122846361       |
| Exon Chr Start (bp)   | 122835935       | 122835935       |                 | 122835935         | 122835935       |
| Exon Chr End (bp)     | 122836099       | 122836099       |                 | 122836099         | 122836099       |
| Exon Chr Start (bp)   | 122833032       | 122833032       |                 | 122833032         | 122833032       |
| Exon Chr End (bp)     | 122833248       | 122833248       |                 | 122833248         | 122833248       |
| Exon Chr Start (bp)   | 122831309       | 122831309       |                 | 122831309         | 122831309       |
| Exon Chr End (bp)     | 122831542       | 122831542       |                 | 122831542         | 122831542       |
| Exon Chr Start (bp)   | 122828458       | 122828458       |                 | 122828458         | 122828458       |
| Exon Chr End (bp)     | 122828722       | 122828722       |                 | 122828722         | 122828722       |
| Exon Chr Start (bp)   | 122825477       | 122825477       |                 | 122825477         | 122825477       |
| Exon Chr End (bp)     | 122825672       | 122825672       |                 | 122825672         | 122825672       |
| Exon Chr Start (bp)   | 122824007       | 122824007       |                 | 122824007         | 122824007       |
| Exon Chr End (bp)     | 122824216       | 122824216       |                 | 122824216         | 122824216       |
| Exon Chr Start (bp)   | 122820767       | 122820767       |                 | 122820767         | 122820767       |
| Exon Chr End (bp)     | 122820850       | 122820850       |                 | 122820850         | 122820850       |
| Exon Chr Start (bp)   | 122803509       | 122803509       |                 | 122803509         | 122803509       |
| Exon Chr End (bp)     | 122803584       | 122803584       |                 | 122803584         | 122803584       |
| Exon Chr Start (bp)   | 122800182       | 122800183       |                 | 122800871         | 122800891       |
| Exon Chr End (bp)     | 122801033       | 122801033       |                 | 122801033         | 122801033       |

D.

| 206425_s_at Probe set                                                     |        |                                                                                                                                   |
|---------------------------------------------------------------------------|--------|-----------------------------------------------------------------------------------------------------------------------------------|
| TRPC3 Transcripts Represented: TRPC3-001, TRPC3-002, TRPC3-004, TRPC3-005 |        |                                                                                                                                   |
| Genomic location (strand)                                                 | Length | Ensembl ID                                                                                                                        |
| 4:122800523-122800547(-)                                                  | 25     | HG-Focus:206425_s_at:105:395; HG-U133A:206425_s_at:494:625; HG-U133A_2:206425_s_at:373:605; HG-U133_Plus_2:206425_s_at:1093:1009; |
| 4:122800573-122800597(-)                                                  | 25     | HG-Focus:206425_s_at:340:187; HG-U133A:206425_s_at:673:295; HG-U133A_2:206425_s_at:621:285; HG-U133_Plus_2:206425_s_at:642:479;   |
| 4:122800582-122800606(-)                                                  | 25     | HG-Focus:206425_s_at:169:407; HG-U133A:206425_s_at:552:653; HG-U133A_2:206425_s_at:284:635; HG-U133_Plus_2:206425_s_at:544:1059;  |
| 4:122800604-122800628(-)                                                  | 25     | HG-Focus:206425_s_at:71:39; HG-U133A:206425_s_at:256:57; HG-U133A_2:206425_s_at:706:55; HG-U133_Plus_2:206425_s_at:537:99;        |
| 4:122800682-122800706(-)                                                  | 25     | HG-Focus:206425_s_at:99:203; HG-U133A:206425_s_at:187:319; HG-U133A_2:206425_s_at:264:309; HG-U133_Plus_2:206425_s_at:6:513;      |
| 4:122800768-122800792(-)                                                  | 25     | HG-Focus:206425_s_at:39:429; HG-U133A:206425_s_at:160:691; HG-U133A_2:206425_s_at:498:669; HG-U133_Plus_2:206425_s_at:403:1123;   |
| 4:122800855-122800879(-)                                                  | 25     | HG-Focus:206425_s_at:367:325; HG-U133A:206425_s_at:14:515; HG-U133A_2:206425_s_at:298:499; HG-U133_Plus_2:206425_s_at:228:637;    |
| 4:122800868-122800892(-)                                                  | 25     | HG-Focus:206425_s_at:328:261; HG-U133A:206425_s_at:535:417; HG-U133A_2:206425_s_at:150:403; HG-U133_Plus_2:206425_s_at:157:673;   |
| 4:122800900-122800924(-)                                                  | 25     | HG-Focus:206425_s_at:408:231; HG-U133A:206425_s_at:283:365; HG-U133A_2:206425_s_at:580:353; HG-U133_Plus_2:206425_s_at:672:587;   |
| 4:122800948-122800972(-)                                                  | 25     | HG-Focus:206425_s_at:221:211; HG-U133A:206425_s_at:380:385; HG-U133A_2:206425_s_at:207:371; HG-U133_Plus_2:206425_s_at:383:625;   |
| 4:122800985-122801009(-)                                                  | 25     | HG-Focus:206425_s_at:60:133; HG-U133A:206425_s_at:508:15; HG-U133A_2:206425_s_at:8:13; HG-U133_Plus_2:206425_s_at:785:23;         |

| 210814_at Probe set                                 |        |                                                                                               |
|-----------------------------------------------------|--------|-----------------------------------------------------------------------------------------------|
| TRPC3 Transcripts Represented: TRPC3-001, TRPC3-002 |        |                                                                                               |
| Genomic location (strand)                           | Length | Ensembl ID                                                                                    |
| 4:122800223-122800247(-)                            | 25     | HG-U133A:210814_at:266:651; HG-U133A_2:210814_at:529:631; HG-U133_Plus_2:210814_at:1131:1053; |
| 4:122800276-122800300(-)                            | 25     | HG-U133A:210814_at:152:217; HG-U133A_2:210814_at:697:227; HG-U133_Plus_2:210814_at:971:393;   |
| 4:122800293-122800317(-)                            | 25     | HG-U133A:210814_at:679:575; HG-U133A_2:210814_at:50:559; HG-U133_Plus_2:210814_at:447:935;    |
| 4:122800301-122800325(-)                            | 25     | HG-U133A:210814_at:48:503; HG-U133A_2:210814_at:196:489; HG-U133_Plus_2:210814_at:720:817;    |
| 4:122800315-122800339(-)                            | 25     | HG-U133A:210814_at:556:695; HG-U133A_2:210814_at:337:673; HG-U133_Plus_2:210814_at:150:1133;  |
| 4:122800334-122800358(-)                            | 25     | HG-U133A:210814_at:319:317; HG-U133A_2:210814_at:657:307; HG-U133_Plus_2:210814_at:74:513;    |
| 4:122800349-122800373(-)                            | 25     | HG-U133A:210814_at:51:377; HG-U133A_2:210814_at:191:365; HG-U133_Plus_2:210814_at:938:607;    |
| 4:122800356-122800380(-)                            | 25     | HG-U133A:210814_at:233:135; HG-U133A_2:210814_at:475:131; HG-U133_Plus_2:210814_at:502:237;   |
| 4:122800403-122800427(-)                            | 25     | HG-U133A:210814_at:663:253; HG-U133A_2:210814_at:540:247; HG-U133_Plus_2:210814_at:434:425;   |
| 4:122800408-122800432(-)                            | 25     | HG-U133A:210814_at:215:87; HG-U133A_2:210814_at:12:87; HG-U133_Plus_2:210814_at:1120:151;     |
| 4:122800422-122800446(-)                            | 25     | HG-U133A:210814_at:150:637; HG-U133A_2:210814_at:636:617; HG-U133_Plus_2:210814_at:1120:1027; |
