# Supplementary material
Source: PubMed Central journal article supplement (PMC4318721)
Supplement: NIHMS641564-supplement-Supp_TableS1.pdf [file NIHMS641564-supplement-Supp_TableS1.pdf]

| Gene  | Variant             | Alleles              | MAF (%) | GERP  | SIFT (cutoff=0.05) | Polyphen2(Class:Score)  | Condel      | Mutpred | SNPs&GO            | GeneAccession  | HGVIS Protein Variant | HGVIS CDNA Variant | FunctionGVIS      |
|-------|---------------------|----------------------|---------|-------|--------------------|-------------------------|-------------|---------|--------------------|----------------|-----------------------|--------------------|-------------------|
| TRPC3 | Chr4:122824185 G>A  | C>T                  | 0.0077  | 5.9   | Damaging           | probably-damaging:0.989 | Deleterious | 0.775   | Disease-Associated | NM_001130698.1 | p.R762H               | c.2285G>A          | missense          |
| TRPC3 | Chr4:122853695 G>T  | C>A                  | 0.0077  | 5.66  | Damaging           | probably-damaging:1.0   | Deleterious | 0.929   | Disease-Associated | NM_001130698.1 | p.A240S               | c.718G>T           | missense          |
| TRPC3 | Chr4:122839575 C>T  | G>A                  | 0.0077  | 5.5   | Damaging           | probably-damaging:0.994 | Deleterious | 0.777   | Disease-Associated | NM_001130698.1 | p.P434L               | c.1301C>T          | missense          |
| TRPC3 | Chr4:122846208 C>T  | G>A                  | 0.0077  | 5.92  | Damaging           | probably-damaging:1.0   | Deleterious | 0.744   | Disease-Associated | NM_001130698.1 | p.R381C               | c.1141C>T          | missense          |
| TRPC3 | Chr4:122853824 C>T  | G>A                  | 0.0077  | 5.81  | Damaging           | probably-damaging:1.0   | Deleterious | 0.467   | Disease-Associated | NM_001130698.1 | p.H197Y               | c.589C>G           | missense          |
| TRPC3 | Chr4:122803932 C>G  | G>C                  | 0.0077  | 6.18  | Damaging           | possibly-damaging:0.956 | Deleterious | 0.357   | Neutral            | NM_001130698.1 | p.L909V               | c.2725C>G          | missense          |
| TRPC3 | Chr4:122820775 C>T  | G>A                  | 0.0077  | 5.62  | Damaging           | probably-damaging:0.997 | Deleterious | 0.506   | Neutral            | NM_001130698.1 | p.R847C               | c.2539C>T          | missense          |
| TRPC3 | Chr4:122836062 C>T  | G>A                  | 0.0154  | 5.5   | Damaging           | probably-damaging:0.999 | Deleterious | 0.723   | Neutral            | NM_001130698.1 | p.T405M               | c.1214C>T          | missense          |
| TRPC3 | Chr4:122853484 C>T  | G>A                  | 0.0077  | 5.34  | Damaging           | probably-damaging:0.999 | Deleterious | 0.615   | Neutral            | NM_001130698.1 | p.T310M               | c.929C>T           | missense          |
| TRPC3 | Chr4:122835948 C>T  | G>A                  | 0.0077  | 5.5   | Damaging           | possibly-damaging:0.85  | Neutral     | 0.564   | Disease-Associated | NM_001130698.1 | p.A443V               | c.1328C>T          | missense          |
| TRPC3 | Chr4:122853923 G>A  | C>T                  | 0.0077  | 5.95  | Damaging           | probably-damaging:0.974 | Neutral     | 0.665   | Neutral            | NM_001130698.1 | p.E164K               | c.490G>A           | missense          |
| TRPC3 | Chr4:122800922 A>C  | T>G                  | 0.0077  | 4.92  | Damaging           | possibly-damaging:0.57  | Neutral     | 0.223   | Neutral            | NM_001130698.1 | p.K912T               | c.2735A>G          | missense          |
| TRPC3 | Chr4:122800971 A>G  | T>C                  | 0.0461  | 4.94  | Damaging           | benign:0.417            | Deleterious | 0.286   | Neutral            | NM_001130698.1 | p.R896G               | c.2686A>G          | missense          |
| TRPC3 | Chr4:122825542 A>G  | T>C                  | 0.0077  | 5.52  | Tolerated          | possibly-damaging:0.949 | Neutral     | 0.534   | Disease-Associated | NM_001130698.1 | p.R105H               | c.2188A>G          | missense          |
| TRPC3 | Chr4:122846297 G>A  | C>T                  | 0.0077  | 5.92  | Tolerated          | probably-damaging:0.977 | Neutral     | 0.678   | Disease-Associated | NM_001130698.1 | p.R351Q               | c.1052G>A          | missense          |
| TRPC3 | Chr4:122824086 G>C  | C>G                  | 0.0077  | 5.77  | Tolerated          | possibly-damaging:0.776 | Neutral     | 0.557   | Disease-Associated | NM_001130698.1 | p.R795P               | c.2384G>C          | missense          |
| TRPC3 | Chr4:122854150 A>G  | T>C                  | 0.0077  | 5.8   | Damaging           | benign:0.034            | Neutral     | 0.237   | Neutral            | NM_001130698.1 | p.E88G                | c.263A>G           | missense          |
| TRPC3 | Chr4:122846193 A>G  | T>C                  | 0.0308  | 5.92  | Tolerated          | possibly-damaging:0.947 | Neutral     | 0.614   | Neutral            | NM_001130698.1 | p.I360V               | c.1156A>G          | missense          |
| TRPC3 | Chr4:122829809 T>C  | A>G                  | 0.0077  | 5.5   | Tolerated          | probably-damaging:0.989 | Neutral     | 0.67    | Neutral            | NM_001130698.1 | p.F636L               | c.1906T>C          | missense          |
| TRPC3 | Chr4:122835991 G>A  | C>T                  | 0.0308  | 5.5   | Tolerated          | possibly-damaging:0.93  | Neutral     | 0.502   | Neutral            | NM_001130698.1 | p.V429M               | c.1285G>A          | missense          |
| TRPC3 | Chr4:122835999 T>C  | A>G                  | 0.0231  | 5.5   | Tolerated          | possibly-damaging:0.621 | Neutral     | 0.533   | Neutral            | NM_001130698.1 | p.V426A               | c.1277T>C          | missense          |
| TRPC3 | Chr4:122800957 G>C  | C>G                  | 0.0077  | 4.44  | Tolerated          | possibly-damaging:0.588 | Neutral     | 0.199   | Neutral            | NM_001130698.1 | p.E900D               | c.2700C>G          | missense          |
| TRPC3 | Chr4:122853895 C>A  | G>T                  | 0.0077  | 5.07  | Tolerated          | probably-damaging:0.969 | Neutral     | 0.601   | Neutral            | NM_001130698.1 | p.A172E               | c.518C>A           | missense          |
| TRPC3 | Chr4:122825566 G>A  | C>T                  | 0.0077  | 4.67  | Tolerated          | possibly-damaging:0.469 | Neutral     | 0.372   | Neutral            | NM_001130698.1 | p.V713C               | c.2164G>A          | missense          |
| TRPC3 | Chr4:122824032 T>C  | A>G                  | 0.0154  | 5.9   | Tolerated          | benign:0.03             | Neutral     | 0.3     | Neutral            | NM_001130698.1 | p.M813T               | c.2438T>C          | missense          |
| TRPC3 | Chr4:122833191 A>G  | T>C                  | 0.0231  | 5.21  | Tolerated          | benign:0.006            | Neutral     | 0.512   | Neutral            | NM_001130698.1 | p.I467V               | c.1399A>G          | missense          |
| TRPC3 | Chr4:122854099 G>A  | C>T                  | 0.0077  | 5.94  | Tolerated          | benign:0.011            | Neutral     | 0.458   | Neutral            | NM_001130698.1 | p.R105H               | c.314G>A           | missense          |
| TRPC3 | Chr4:122828630 A>G  | T>C                  | 0.0154  | 5.5   | Tolerated          | benign:0.303            | Neutral     | 0.453   | Neutral            | NM_001130698.1 | p.I629V               | c.1885A>G          | missense          |
| TRPC3 | Chr4:122824103 T>A  | A>T                  | 0.0077  | 4.59  | Tolerated          | benign:0.0              | Neutral     | 0.413   | Neutral            | NM_001130698.1 | p.F789L               | c.2367T>A          | missense          |
| TRPC3 | Chr4:122835964 A>T  | T>A                  | 0.1153  | 5.5   | Tolerated          | benign:0.002            | Neutral     | 0.531   | Neutral            | NM_001130698.1 | p.I438F               | c.1312A>T          | missense          |
| TRPC3 | Chr4:122836015 A>G  | T>C                  | 0.0077  | 3.04  | Tolerated          | benign:0.001            | Neutral     | 0.315   | Neutral            | NM_001130698.1 | p.I421V               | c.1261A>G          | missense          |
| TRPC3 | Chr4:122824011 C>T  | G>A                  | 0.0077  | 5.9   | Tolerated          | benign:0.001            | Neutral     | 0.369   | Neutral            | NM_001130698.1 | p.S80F                | c.2459C>T          | missense          |
| TRPC3 | Chr4:122836023 C>A  | G>T                  | 0.0077  | 5.5   | Tolerated          | benign:0.005            | Neutral     | 0.448   | Neutral            | NM_001130698.1 | p.T418N               | c.1253C>A          | missense          |
| TRPC3 | Chr4:122800929 A>G  | T>C                  | 0.0077  | 6.16  | Tolerated          | benign:0.0              | Neutral     | 0.224   | Neutral            | NM_001130698.1 | p.S910G               | c.2728A>G          | missense          |
| TRPC3 | Chr4:122824093 A>T  | T>A                  | 0.0077  | 0.21  | Tolerated          | benign:0.0              | Neutral     | 0.449   | Neutral            | NM_001130698.1 | p.I793F               | c.2377A>T          | missense          |
| TRPC3 | Chr4:122831390 C>T  | G>A                  | 0.0077  | 5.56  | -                  | -                       | -           | -       | -                  | NM_001130698.1 | p.Q571*               | c.1711C>T          | stop-gained       |
| TRPC3 | Chr4:122833074 C>T  | G>A                  | 0.0077  | 5.47  | -                  | -                       | -           | -       | -                  | NM_001130698.1 | p.Q506*               | c.1516C>T          | stop-gained       |
| TRPC3 | Chr4:122831423 A>T  | T>A                  | 0.0077  | 2.9   | -                  | -                       | -           | -       | -                  | NM_001130698.1 | p.R660*               | c.1678A>T          | stop-gained       |
| TRPC3 | Chr4:122854029 G>A  | C>A                  | 0.0154  | 5.95  | Tolerated          | -                       | -           | -       | -                  | NM_001130698.1 | p.V128*               | c.384G>T           | coding-synonymous |
| TRPC3 | Chr4:122820845 C>T  | G>A                  | 0.0154  | 4.86  | Tolerated          | -                       | -           | -       | -                  | NM_001130698.1 | p.N823*               | c.2469C>T          | coding-synonymous |
| TRPC3 | Chr4:122833090 C>T  | G>A                  | 0.0077  | 5.47  | Tolerated          | -                       | -           | -       | -                  | NM_001130698.1 | p.F500*               | c.1500C>T          | coding-synonymous |
| TRPC3 | Chr4:122836058 C>T  | G>A                  | 0.0308  | 4.66  | Tolerated          | -                       | -           | -       | -                  | NM_001130698.1 | p.I406*               | c.1218C>T          | coding-synonymous |
| TRPC3 | Chr4:122853501 C>T  | G>A                  | 0.0384  | 5.34  | Tolerated          | -                       | -           | -       | -                  | NM_001130698.1 | p.S304*               | c.912C>T           | coding-synonymous |
| TRPC3 | Chr4:122803944 C>T  | G>A                  | 0.0077  | 5.31  | Tolerated          | -                       | -           | -       | -                  | NM_001130698.1 | p.I411V               | c.2713C>T          | coding-synonymous |
| TRPC3 | Chr4:122835983 G>A  | C>T                  | 0.0077  | 5.5   | Tolerated          | -                       | -           | -       | -                  | NM_001130698.1 | p.L431*               | c.1293G>A          | coding-synonymous |
| TRPC3 | Chr4:122853939 G>A  | C>T                  | 0.0231  | 9.5   | Tolerated          | -                       | -           | -       | -                  | NM_001130698.1 | p.E158*               | c.474G>A           | coding-synonymous |
| TRPC3 | Chr4:122828484 G>A  | C>T                  | 0.0077  | 4.65  | Tolerated          | -                       | -           | -       | -                  | NM_001130698.1 | p.G677*               | c.2031G>A          | coding-synonymous |
| TRPC3 | Chr4:122853900 C>T  | G>A                  | 0.0077  | 5.95  | Tolerated          | -                       | -           | -       | -                  | NM_001130698.1 | p.N171*               | c.513C>T           | coding-synonymous |
| TRPC3 | Chr4:122800987 A>G  | T>C                  | 2.1913  | 3.76  | Tolerated          | -                       | -           | -       | -                  | NM_001130698.1 | p.E890*               | c.2670A>G          | coding-synonymous |
| TRPC3 | Chr4:122853882 C>T  | G>A                  | 0.0077  | 3.28  | Tolerated          | -                       | -           | -       | -                  | NM_001130698.1 | p.D177*               | c.531C>T           | coding-synonymous |
| TRPC3 | Chr4:122825603 C>A  | G>T                  | 0.0077  | 2.99  | Tolerated          | -                       | -           | -       | -                  | NM_001130698.1 | p.L709*               | c.2127C>A          | coding-synonymous |
| TRPC3 | Chr4:122853609 G>A  | C>T                  | 0.6382  | 2.95  | Tolerated          | -                       | -           | -       | -                  | NM_001130698.1 | p.K268*               | c.804G>A           | coding-synonymous |
| TRPC3 | Chr4:122824052 G>A  | C>T                  | 26.4263 | 2.65  | Tolerated          | -                       | -           | -       | -                  | NM_001130698.1 | p.R806*               | c.2418G>A          | coding-synonymous |
| TRPC3 | Chr4:122828667 C>T  | G>A                  | 0.0154  | 2.14  | Tolerated          | -                       | -           | -       | -                  | NM_001130698.1 | p.A616*               | c.1848C>T          | coding-synonymous |
| TRPC3 | Chr4:122833102 C>G  | G>C                  | 0.0154  | 1.57  | Tolerated          | -                       | -           | -       | -                  | NM_001130698.1 | p.P496*               | c.1488C>G          | coding-synonymous |
| TRPC3 | Chr4:122835980 C>T  | G>A                  | 1.7992  | 1.47  | Tolerated          | -                       | -           | -       | -                  | NM_001130698.1 | p.G432*               | c.2163C>T          | coding-synonymous |
| TRPC3 | Chr4:122853501 A>G  | C>T                  | 0.0946  | 1.31  | Tolerated          | -                       | -           | -       | -                  | NM_001130698.1 | p.D118*               | c.2454G>C          | coding-synonymous |
| TRPC3 | Chr4:122853750 C>T  | G>A                  | 0.0692  | 0.95  | Tolerated          | -                       | -           | -       | -                  | NM_001130698.1 | p.I905*               | c.663C>T           | coding-synonymous |
| TRPC3 | Chr4:122853690 G>A  | C>T                  | 0.0154  | 0.47  | Tolerated          | -                       | -           | -       | -                  | NM_001130698.1 | p.A241*               | c.723G>A           | coding-synonymous |
| TRPC3 | Chr4:122853879 C>T  | G>A                  | 0.0077  | -0.97 | Tolerated          | -                       | -           | -       | -                  | NM_001130698.1 | p.A178*               | c.534C>T           | coding-synonymous |
| TRPC3 | Chr4:122854116 C>G  | G>C                  | 7.2362  | -0.99 | Tolerated          | -                       | -           | -       | -                  | NM_001130698.1 | p.A99*                | c.297C>G           | coding-synonymous |
| TRPC3 | Chr4:122824040 T>C  | A>G                  | 0.0077  | -1.37 | Tolerated          | -                       | -           | -       | -                  | NM_001130698.1 | p.D810*               | c.2430T>C          | coding-synonymous |
| TRPC3 | Chr4:122833132 G>A  | C>T                  | 0.0077  | -2.1  | Tolerated          | -                       | -           | -       | -                  | NM_001130698.1 | p.T486*               | c.1458G>A          | coding-synonymous |
| TRPC3 | Chr4:122854095 C>T  | G>A                  | 0.0077  | -2.32 | Tolerated          | -                       | -           | -       | -                  | NM_001130698.1 | p.G106*               | c.318C>T           | coding-synonymous |
| TRPC3 | Chr4:122831394 G>A  | C>T                  | 0.223   | -2.89 | Tolerated          | -                       | -           | -       | -                  | NM_001130698.1 | p.K569*               | c.1707G>A          | coding-synonymous |
| TRPC3 | Chr4:122833201 A>G  | T>C                  | 0.0077  | -5.32 | Tolerated          | -                       | -           | -       | -                  | NM_001130698.1 | p.A463*               | c.1389A>G          | coding-synonymous |
| TRPC3 | Chr4:122831472 T>C  | A>G                  | 0.0154  | -5.41 | Tolerated          | -                       | -           | -       | -                  | NM_001130698.1 | p.N543*               | c.1629T>C          | coding-synonymous |
| TRPC3 | Chr4:122854098 C>T  | G>A                  | 0.0077  | -7.02 | Tolerated          | -                       | -           | -       | -                  | NM_001130698.1 | p.R105*               | c.315C>T           | coding-synonymous |
| TRPC3 | Chr4:122825567 C>T  | G>A                  | 0.0308  | -9.01 | Tolerated          | -                       | -           | -       | -                  | NM_001130698.1 | p.Y721*               | c.2163C>T          | coding-synonymous |
| TRPC3 | Chr4:122824016 A>G  | T>C                  | 0.0077  | -9.88 | Tolerated          | -                       | -           | -       | -                  | NM_001130698.1 | p.S818*               | c.2454G>C          | coding-synonymous |
| TRPC3 | Chr4:122853717 G>A  | C>T                  | 0.0077  | -10   | Tolerated          | -                       | -           | -       | -                  | NM_001130698.1 | p.P232*               | c.698G>A           | coding-synonymous |
| TRPC3 | Chr4:122828634 G>A  | C>T                  | 0.0077  | -11   | Tolerated          | -                       | -           | -       | -                  | NM_001130698.1 | p.A627*               | c.1881G>A          | coding-synonymous |
| TRPC3 | Chr4:122836061 G>T  | C>A                  | 0.0077  | -11   | Tolerated          | -                       | -           | -       | -                  | NM_001130698.1 | p.T405*               | c.1215G>A          | coding-synonymous |
| TRPC3 | Chr4:122824106 A>G  | T>C                  | 0.0231  | -11.4 | Tolerated          | -                       | -           | -       | -                  | NM_001130698.1 | p.S788*               | c.2364A>G          | coding-synonymous |
| TRPC3 | Chr4:122825612 C>A  | G>T                  | 0.0308  | -11.5 | Tolerated          | -                       | -           | -       | -                  | NM_001130698.1 | p.S706*               | c.2118C>A          | coding-synonymous |
| TRPC3 | Chr4:122824233 insT | GAAAA>GAAAAA;GAAAA>G | 0.4574  | 1.35  | -                  |                         |             |         |                    |                |                       |                    |                   |
